# Supplementary material for: Genetic Diversity of Merozoite Surface Antigens in Global Babesia bovis Populations
Source: MDPI journal article supplement (doi:10.3390/genes14101936), 2023-10-13
Supplement: s1 [file s1]

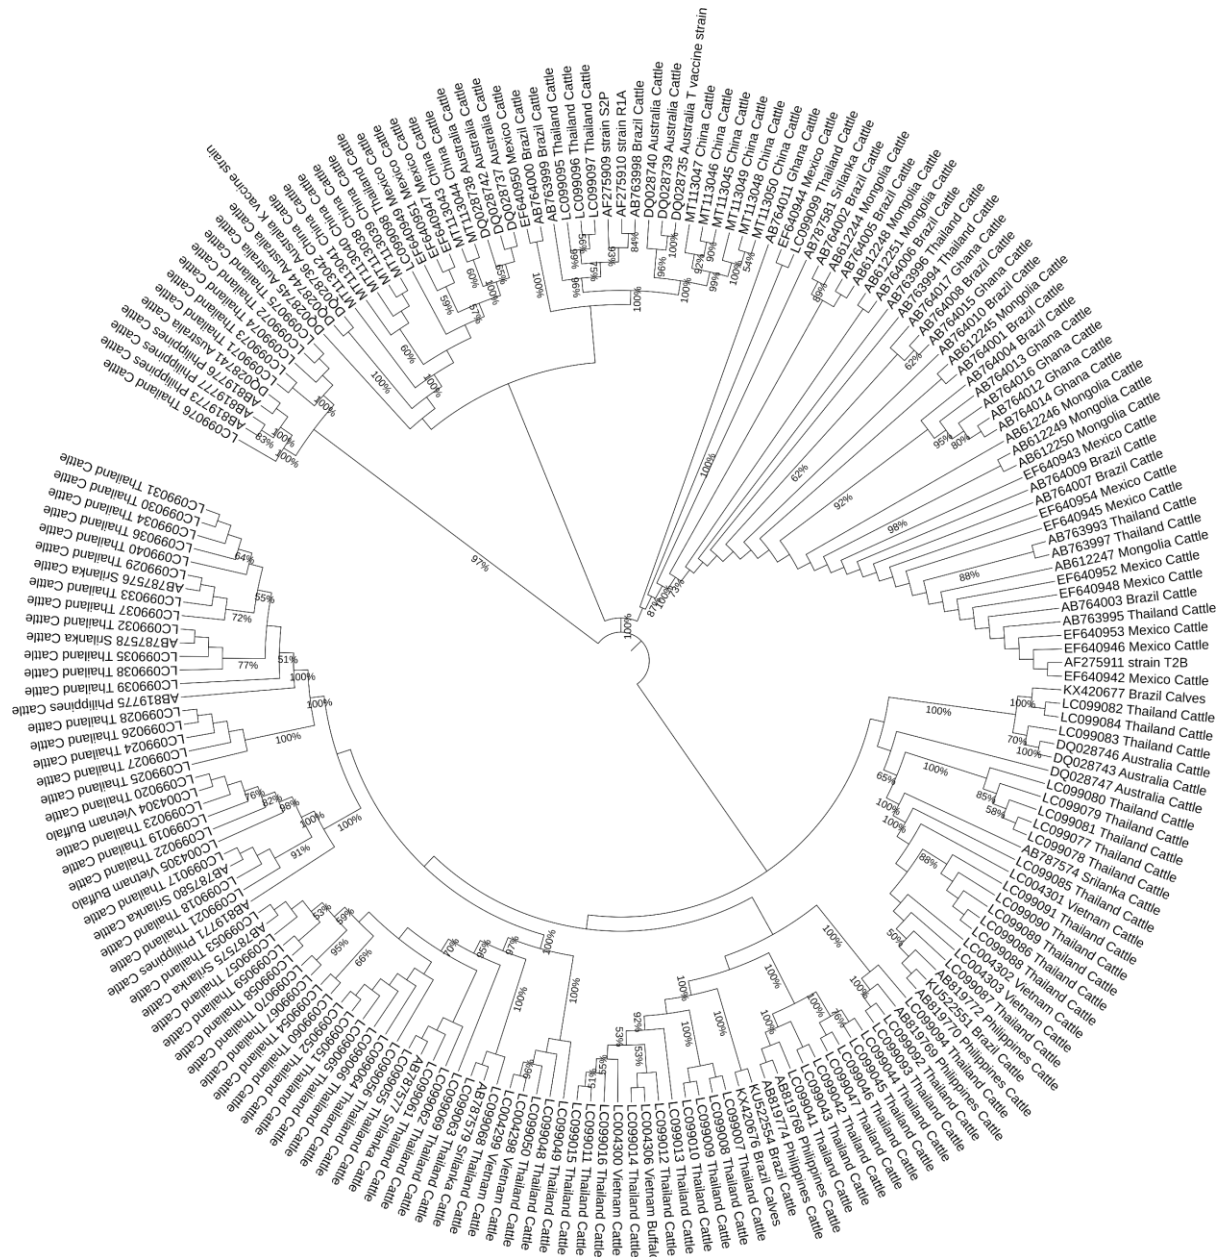

**Figure S1.** An unrooted phylogenetic tree of *B. bovis* MSA-1 gene constructed using the Maximum likelihood method based on Hasegawa-Kishino-Yano (HKY) Model. Numbers at the nodes represent the bootstrap values with more than 50% bootstrap support from 1000 replicates.

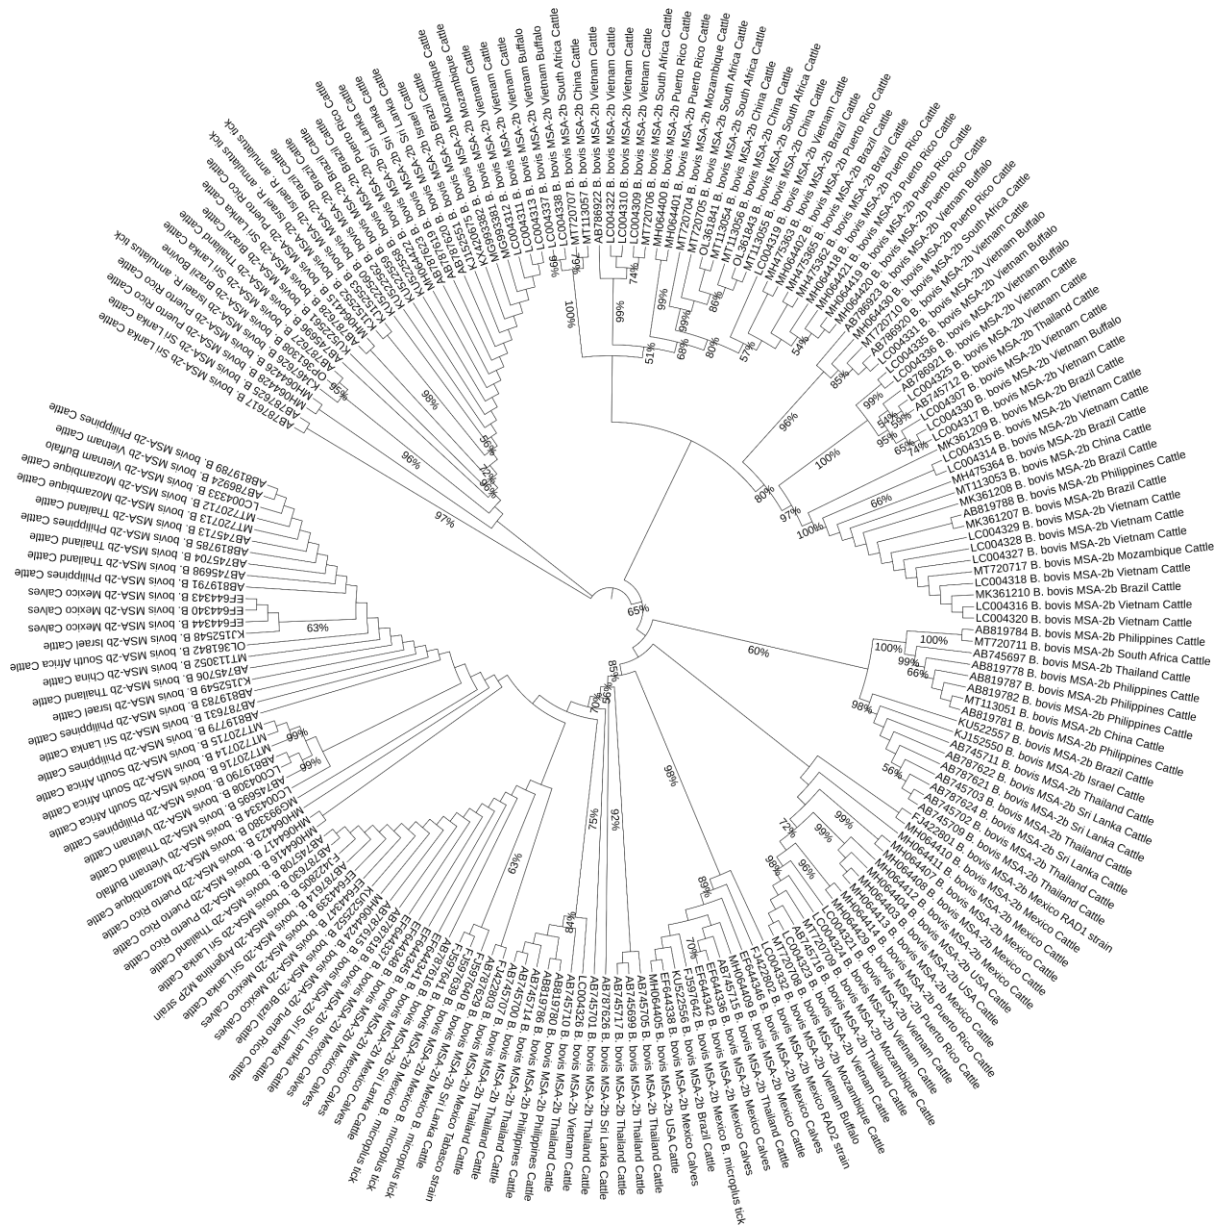

**Figure S2.** An unrooted phylogenetic tree of *B. bovis* MSA-2b gene fragment constructed using the Maximum likelihood method based on Hasegawa-Kishino-Yano (HKY) Model. Numbers at the nodes represent the bootstrap values with more than 50% bootstrap support from 1000 replicates.

**Supplementary Table S1.** Data describing the GenBank retrieved nucleotide sequences of *Babesia bovis* isolates that tested for various MSA fragments.

| Country               | Host   | GenBank accession number | Reference                |
|-----------------------|--------|--------------------------|--------------------------|
| <b>MSA-1 isolates</b> |        |                          |                          |
| Brazil                | Cattle | KX420677                 | Matos et al., 2017       |
| Brazil                | Cattle | KX420676                 | Matos et al., 2017       |
| Thailand              | Cattle | LC099099                 | Tattiyapong et al., 2016 |
| Thailand              | Cattle | LC099098                 | Tattiyapong et al., 2016 |
| Thailand              | Cattle | LC099097                 | Tattiyapong et al., 2016 |
| Thailand              | Cattle | LC099096                 | Tattiyapong et al., 2016 |
| Thailand              | Cattle | LC099095                 | Tattiyapong et al., 2016 |
| Thailand              | Cattle | LC099094                 | Tattiyapong et al., 2016 |
| Thailand              | Cattle | LC099093                 | Tattiyapong et al., 2016 |
| Thailand              | Cattle | LC099092                 | Tattiyapong et al., 2016 |
| Thailand              | Cattle | LC099091                 | Tattiyapong et al., 2016 |
| Thailand              | Cattle | LC099090                 | Tattiyapong et al., 2016 |
| Thailand              | Cattle | LC099089                 | Tattiyapong et al., 2016 |
| Thailand              | Cattle | LC099088                 | Tattiyapong et al., 2016 |
| Thailand              | Cattle | LC099087                 | Tattiyapong et al., 2016 |
| Thailand              | Cattle | LC099086                 | Tattiyapong et al., 2016 |
| Thailand              | Cattle | LC099085                 | Tattiyapong et al., 2016 |
| Thailand              | Cattle | LC099084                 | Tattiyapong et al., 2016 |
| Thailand              | Cattle | LC099083                 | Tattiyapong et al., 2016 |
| Thailand              | Cattle | LC099082                 | Tattiyapong et al., 2016 |
| Thailand              | Cattle | LC099081                 | Tattiyapong et al., 2016 |
| Thailand              | Cattle | LC099080                 | Tattiyapong et al., 2016 |
| Thailand              | Cattle | LC099079                 | Tattiyapong et al., 2016 |
| Thailand              | Cattle | LC099078                 | Tattiyapong et al., 2016 |
| Thailand              | Cattle | LC099077                 | Tattiyapong et al., 2016 |
| Thailand              | Cattle | LC099076                 | Tattiyapong et al., 2016 |
| Thailand              | Cattle | LC099075                 | Tattiyapong et al., 2016 |
| Thailand              | Cattle | LC099074                 | Tattiyapong et al., 2016 |
| Thailand              | Cattle | LC099073                 | Tattiyapong et al., 2016 |
| Thailand              | Cattle | LC099072                 | Tattiyapong et al., 2016 |
| Thailand              | Cattle | LC099071                 | Tattiyapong et al., 2016 |
| Thailand              | Cattle | LC099070                 | Tattiyapong et al., 2016 |
| Thailand              | Cattle | LC099069                 | Tattiyapong et al., 2016 |
| Thailand              | Cattle | LC099068                 | Tattiyapong et al., 2016 |
| Thailand              | Cattle | LC099067                 | Tattiyapong et al., 2016 |
| Thailand              | Cattle | LC099066                 | Tattiyapong et al., 2016 |
| Thailand              | Cattle | LC099065                 | Tattiyapong et al., 2016 |
| Thailand              | Cattle | LC099064                 | Tattiyapong et al., 2016 |
| Thailand              | Cattle | LC099063                 | Tattiyapong et al., 2016 |
| Thailand              | Cattle | LC099062                 | Tattiyapong et al., 2016 |
| Thailand              | Cattle | LC099061                 | Tattiyapong et al., 2016 |
| Thailand              | Cattle | LC099060                 | Tattiyapong et al., 2016 |
| Thailand              | Cattle | LC099059                 | Tattiyapong et al., 2016 |

[illegible]

|          |         |          |                          |
|----------|---------|----------|--------------------------|
| Thailand | Cattle  | LC099008 | Tattiyapong et al., 2016 |
| Thailand | Cattle  | LC099007 | Tattiyapong et al., 2016 |
| Ghana    | Cattle  | AB764017 | Nagano et al., 2013      |
| Ghana    | Cattle  | AB764016 | Nagano et al., 2013      |
| Ghana    | Cattle  | AB764015 | Nagano et al., 2013      |
| Ghana    | Cattle  | AB764014 | Nagano et al., 2013      |
| Ghana    | Cattle  | AB764013 | Nagano et al., 2013      |
| Ghana    | Cattle  | AB764012 | Nagano et al., 2013      |
| Ghana    | Cattle  | AB764011 | Nagano et al., 2013      |
| Brazil   | Cattle  | AB764010 | Nagano et al., 2013      |
| Brazil   | Cattle  | AB764009 | Nagano et al., 2013      |
| Brazil   | Cattle  | AB764008 | Nagano et al., 2013      |
| Brazil   | Cattle  | AB764007 | Nagano et al., 2013      |
| Brazil   | Cattle  | AB764006 | Nagano et al., 2013      |
| Brazil   | Cattle  | AB764005 | Nagano et al., 2013      |
| Brazil   | Cattle  | AB764004 | Nagano et al., 2013      |
| Brazil   | Cattle  | AB764003 | Nagano et al., 2013      |
| Brazil   | Cattle  | AB764002 | Nagano et al., 2013      |
| Brazil   | Cattle  | AB764001 | Nagano et al., 2013      |
| Brazil   | Cattle  | AB764000 | Nagano et al., 2013      |
| Brazil   | Cattle  | AB763999 | Nagano et al., 2013      |
| Brazil   | Cattle  | AB763998 | Nagano et al., 2013      |
| Thailand | Cattle  | AB763997 | Nagano et al., 2013      |
| Thailand | Cattle  | AB763996 | Nagano et al., 2013      |
| Thailand | Cattle  | AB763995 | Nagano et al., 2013      |
| Thailand | Cattle  | AB763994 | Nagano et al., 2013      |
| Thailand | Cattle  | AB763993 | Nagano et al., 2013      |
| Mongolia | Cattle  | AB612251 | Altangerel et al., 2012  |
| Mongolia | Cattle  | AB612250 | Altangerel et al., 2012  |
| Mongolia | Cattle  | AB612249 | Altangerel et al., 2012  |
| Mongolia | Cattle  | AB612248 | Altangerel et al., 2012  |
| Mongolia | Cattle  | AB612247 | Altangerel et al., 2012  |
| Mongolia | Cattle  | AB612246 | Altangerel et al., 2012  |
| Mongolia | Cattle  | AB612245 | Altangerel et al., 2012  |
| Mongolia | Cattle  | AB612244 | Altangerel et al., 2012  |
| Mexico   | Cattle  | EF640954 | Borgonio et al., 2008    |
| Mexico   | Cattle  | EF640953 | Borgonio et al., 2008    |
| Mexico   | Cattle  | EF640952 | Borgonio et al., 2008    |
| Mexico   | Cattle  | EF640951 | Borgonio et al., 2008    |
| Mexico   | Cattle  | EF640950 | Borgonio et al., 2008    |
| Mexico   | Cattle  | EF640949 | Borgonio et al., 2008    |
| Mexico   | Cattle  | EF640948 | Borgonio et al., 2008    |
| Mexico   | Cattle  | EF640947 | Borgonio et al., 2008    |
| Mexico   | Cattle  | EF640946 | Borgonio et al., 2008    |
| Mexico   | Cattle  | EF640945 | Borgonio et al., 2008    |
| Mexico   | Cattle  | EF640944 | Borgonio et al., 2008    |
| Vietnam  | Buffalo | LC004306 | Yokoyama et al., 2015    |
| Vietnam  | Buffalo | LC004305 | Yokoyama et al., 2015    |
| Vietnam  | Buffalo | LC004304 | Yokoyama et al., 2015    |
| Vietnam  | Cattle  | LC004303 | Yokoyama et al., 2015    |

|             |                  |          |                          |
|-------------|------------------|----------|--------------------------|
| Vietnam     | Cattle           | LC004302 | Yokoyama et al., 2015    |
| Vietnam     | Cattle           | LC004301 | Yokoyama et al., 2015    |
| Vietnam     | Cattle           | LC004300 | Yokoyama et al., 2015    |
| Vietnam     | Cattle           | LC004299 | Yokoyama et al., 2015    |
| Vietnam     | Cattle           | LC004298 | Yokoyama et al., 2015    |
| Sri Lanka   | Cattle           | AB787581 | Sivakumar et al., 2013   |
| Sri Lanka   | Cattle           | AB787580 | Sivakumar et al., 2013   |
| Sri Lanka   | Cattle           | AB787579 | Sivakumar et al., 2013   |
| Sri Lanka   | Cattle           | AB787578 | Sivakumar et al., 2013   |
| Sri Lanka   | Cattle           | AB787577 | Sivakumar et al., 2013   |
| Sri Lanka   | Cattle           | AB787576 | Sivakumar et al., 2013   |
| Sri Lanka   | Cattle           | AB787575 | Sivakumar et al., 2013   |
| Sri Lanka   | Cattle           | AB787574 | Sivakumar et al., 2013   |
| Philippines | Cattle           | AB819777 | Tattiyapong et al., 2014 |
| Philippines | Cattle           | AB819776 | Tattiyapong et al., 2014 |
| Philippines | Cattle           | AB819775 | Tattiyapong et al., 2014 |
| Philippines | Cattle           | AB819774 | Tattiyapong et al., 2014 |
| Philippines | Cattle           | AB819773 | Tattiyapong et al., 2014 |
| Philippines | Cattle           | AB819772 | Tattiyapong et al., 2014 |
| Philippines | Cattle           | AB819771 | Tattiyapong et al., 2014 |
| Philippines | Cattle           | AB819770 | Tattiyapong et al., 2014 |
| Philippines | Cattle           | AB819769 | Tattiyapong et al., 2014 |
| Philippines | Cattle           | AB819768 | Tattiyapong et al., 2014 |
| China       | Cattle           | MT113050 | Wang et al., 2020        |
| China       | Cattle           | MT113049 | Wang et al., 2020        |
| China       | Cattle           | MT113048 | Wang et al., 2020        |
| China       | Cattle           | MT113047 | Wang et al., 2020        |
| China       | Cattle           | MT113046 | Wang et al., 2020        |
| China       | Cattle           | MT113045 | Wang et al., 2020        |
| China       | Cattle           | MT113044 | Wang et al., 2020        |
| China       | Cattle           | MT113043 | Wang et al., 2020        |
| China       | Cattle           | MT113042 | Wang et al., 2020        |
| China       | Cattle           | MT113041 | Wang et al., 2020        |
| China       | Cattle           | MT113040 | Wang et al., 2020        |
| China       | Cattle           | MT113039 | Wang et al., 2020        |
| China       | Cattle           | MT113038 | Wang et al., 2020        |
| Brazil      | Cattle           | KU522554 | Unpublished              |
| Brazil      | Cattle           | KU522551 | Unpublished              |
| Mexico      | Cattle           | EF640943 | Borgonio et al., 2008    |
| Mexico      | Cattle           | EF640942 | Borgonio et al., 2008    |
| Australia   | T vaccine strain | DQ028735 | LeRoith et al., 2005     |
| Australia   | K vaccine strain | DQ028736 | LeRoith et al., 2005     |
| Australia   | Cattle           | DQ028737 | LeRoith et al., 2005     |
| Australia   | Cattle           | DQ028738 | LeRoith et al., 2005     |
| Australia   | Cattle           | DQ028739 | LeRoith et al., 2005     |
| Australia   | Cattle           | DQ028740 | LeRoith et al., 2005     |
| Australia   | Cattle           | DQ028741 | LeRoith et al., 2005     |
| Australia   | Cattle           | DQ028742 | LeRoith et al., 2005     |
| Australia   | Cattle           | DQ028743 | LeRoith et al., 2005     |
| Australia   | Cattle           | DQ028744 | LeRoith et al., 2005     |

|                         |                    |          |                                 |
|-------------------------|--------------------|----------|---------------------------------|
| Australia               | Cattle             | DQ028745 | LeRoith et al., 2005            |
| Australia               | Cattle             | DQ028746 | LeRoith et al., 2005            |
| Australia               | Cattle             | DQ028747 | LeRoith et al., 2005            |
| Argentina               | strain S2P         | AF275909 | Suarez et al., 2000             |
| Argentina               | strain R1A         | AF275910 | Suarez et al., 2000             |
| USA                     | strain T2B         | AF275911 | Suarez et al., 2000             |
| <b>MSA-2a1 isolates</b> |                    |          |                                 |
| Israel                  | Cattle calves      | KJ156373 | Molad et al., 2014              |
| Israel                  | Cattle calves      | KJ156372 | Molad et al., 2014              |
| Israel                  | Cattle calves      | KJ156371 | Molad et al., 2014              |
| Israel                  | Cattle calves      | KJ144252 | Molad et al., 2015              |
| Israel                  | Cattle             | KJ156370 | Molad et al., 2014              |
| Israel                  | R. annulatus ticks | KJ152555 | Molad et al., 2014              |
| Israel                  | R. annulatus ticks | KJ152554 | Molad et al., 2014              |
| Sri Lanka               | Cattle             | AB787610 | Sivakumar et al., 2013          |
| Sri Lanka               | Cattle             | AB787609 | Sivakumar et al., 2013          |
| Sri Lanka               | Cattle             | AB787608 | Sivakumar et al., 2013          |
| Sri Lanka               | Cattle             | AB787607 | Sivakumar et al., 2013          |
| Sri Lanka               | Cattle             | AB787606 | Sivakumar et al., 2013          |
| Sri Lanka               | Cattle             | AB787605 | Sivakumar et al., 2013          |
| Sri Lanka               | Cattle             | AB787604 | Sivakumar et al., 2013          |
| Sri Lanka               | Cattle             | AB787603 | Sivakumar et al., 2013          |
| Sri Lanka               | Cattle             | AB787602 | Sivakumar et al., 2013          |
| Sri Lanka               | Cattle             | AB787601 | Sivakumar et al., 2013          |
| Sri Lanka               | Cattle             | AB787600 | Sivakumar et al., 2013          |
| Mexico                  | Calves             | FJ422809 | Dominguez et al., 2010          |
| Argentina               | Calves             | FJ422808 | Dominguez et al., 2010          |
| Argentina               | Calves             | FJ422807 | Dominguez et al., 2010          |
| Argentina               | Calves             | FJ422806 | Dominguez et al., 2010          |
| Mexico                  | strain Mo7         | AY052538 | Florin-Christensen et al., 2002 |
| Argentina               | strain R1A         | AY052539 | Florin-Christensen et al., 2002 |
| <b>MSA-2b isolates</b>  |                    |          |                                 |
| Puerto Rico             | Cattle             | MH064430 | Unpublished                     |
| Puerto Rico             | Cattle             | MH064429 | Unpublished                     |
| Puerto Rico             | Cattle             | MH064428 | Unpublished                     |
| Puerto Rico             | Cattle             | MH064426 | Unpublished                     |
| Puerto Rico             | Cattle             | MH064424 | Unpublished                     |
| Puerto Rico             | Cattle             | MH064423 | Unpublished                     |
| Puerto Rico             | Cattle             | MH064422 | Unpublished                     |
| Puerto Rico             | Cattle             | MH064421 | Unpublished                     |
| Puerto Rico             | Cattle             | MH064420 | Unpublished                     |
| Puerto Rico             | Cattle             | MH064419 | Unpublished                     |
| Puerto Rico             | Cattle             | MH064418 | Unpublished                     |
| Puerto Rico             | Cattle             | MH064417 | Unpublished                     |
| Puerto Rico             | Cattle             | MH064416 | Unpublished                     |
| Puerto Rico             | Cattle             | MH064415 | Unpublished                     |

|              |                   |          |                         |
|--------------|-------------------|----------|-------------------------|
| Puerto Rico  | Cattle            | MH064414 | Unpublished             |
| Brazil       | Cattle            | KX420675 | Matos et al., 2017      |
| Mexico       | B. microplus tick | FJ597642 | Genis et al., 2009      |
| Mexico       | B. microplus tick | FJ597641 | Genis et al., 2009      |
| Mexico       | B. microplus tick | FJ597640 | Genis et al., 2009      |
| Mexico       | B. microplus tick | FJ597639 | Genis et al., 2009      |
| Thailand     | Cattle            | AB745717 | Simking et al., 2013    |
| Thailand     | Cattle            | AB745716 | Simking et al., 2013    |
| Thailand     | Cattle            | AB745715 | Simking et al., 2013    |
| Thailand     | Cattle            | AB745714 | Simking et al., 2013    |
| Thailand     | Cattle            | AB745713 | Simking et al., 2013    |
| Thailand     | Cattle            | AB745712 | Simking et al., 2013    |
| Thailand     | Cattle            | AB745711 | Simking et al., 2013    |
| Thailand     | Cattle            | AB745710 | Simking et al., 2013    |
| Thailand     | Cattle            | AB745709 | Simking et al., 2013    |
| Thailand     | Cattle            | AB745708 | Simking et al., 2013    |
| Thailand     | Cattle            | AB745707 | Simking et al., 2013    |
| Thailand     | Cattle            | AB745706 | Simking et al., 2013    |
| Thailand     | Cattle            | AB745705 | Simking et al., 2013    |
| Thailand     | Cattle            | AB745704 | Simking et al., 2013    |
| Thailand     | Cattle            | AB745703 | Simking et al., 2013    |
| Thailand     | Cattle            | AB745702 | Simking et al., 2013    |
| Thailand     | Cattle            | AB745701 | Simking et al., 2013    |
| Thailand     | Cattle            | AB745700 | Simking et al., 2013    |
| Thailand     | Cattle            | AB745699 | Simking et al., 2013    |
| Thailand     | Cattle            | AB745698 | Simking et al., 2013    |
| Thailand     | Cattle            | AB745697 | Simking et al., 2013    |
| Thailand     | Cattle            | AB745696 | Simking et al., 2013    |
| Thailand     | Cattle            | AB745695 | Simking et al., 2013    |
| South Africa | Cattle            | OL361843 | Byaruhanga et al., 2023 |
| South Africa | Cattle            | OL361842 | Byaruhanga et al., 2023 |
| South Africa | Cattle            | OL361841 | Byaruhanga et al., 2023 |
| Mozambique   | Cattle            | MT720717 | Byaruhanga et al., 2023 |
| South Africa | Cattle            | MT720716 | Byaruhanga et al., 2023 |
| South Africa | Cattle            | MT720715 | Byaruhanga et al., 2023 |
| South Africa | Cattle            | MT720714 | Byaruhanga et al., 2023 |
| Mozambique   | Cattle            | MT720713 | Byaruhanga et al., 2023 |
| Mozambique   | Cattle            | MT720712 | Byaruhanga et al., 2023 |
| South Africa | Cattle            | MT720711 | Byaruhanga et al., 2023 |
| South Africa | Cattle            | MT720710 | Byaruhanga et al., 2023 |
| Mozambique   | Cattle            | MT720709 | Byaruhanga et al., 2023 |
| Mozambique   | Cattle            | MT720708 | Byaruhanga et al., 2023 |
| South Africa | Cattle            | MT720707 | Byaruhanga et al., 2023 |
| South Africa | Cattle            | MT720706 | Byaruhanga et al., 2023 |
| South Africa | Cattle            | MT720705 | Byaruhanga et al., 2023 |
| Mozambique   | Cattle            | MT720704 | Byaruhanga et al., 2023 |



|             |         |          |                       |
|-------------|---------|----------|-----------------------|
| Brazil      | Cattle  | MK361210 | Mendes et al., 2019   |
| Brazil      | Cattle  | MK361209 | Mendes et al., 2019   |
| Brazil      | Cattle  | MK361208 | Mendes et al., 2019   |
| Brazil      | Cattle  | MK361207 | Mendes et al., 2019   |
| Mexico      | Cattle  | MH064413 | Unpublished           |
| Mexico      | Cattle  | MH064412 | Unpublished           |
| Mexico      | Cattle  | MH064411 | Unpublished           |
| Mexico      | Cattle  | MH064410 | Unpublished           |
| Mexico      | Cattle  | MH064409 | Unpublished           |
| Mexico      | Cattle  | MH064408 | Unpublished           |
| Mexico      | Cattle  | MH064407 | Unpublished           |
| USA         | Cattle  | MH064405 | Unpublished           |
| USA         | Cattle  | MH064404 | Unpublished           |
| USA         | Cattle  | MH064403 | Unpublished           |
| Puerto Rico | Cattle  | MH064402 | Unpublished           |
| Puerto Rico | Cattle  | MH064401 | Unpublished           |
| Puerto Rico | Cattle  | MH064400 | Unpublished           |
| Brazil      | Cattle  | MH475365 | Mendes et al., 2019   |
| Brazil      | Cattle  | MH475364 | Mendes et al., 2019   |
| Brazil      | Cattle  | MH475363 | Mendes et al., 2019   |
| Brazil      | Cattle  | MH475362 | Mendes et al., 2019   |
| Mozambique  | Cattle  | MG993382 | Unpublished           |
| Mozambique  | Cattle  | MG993381 | Unpublished           |
| Mozambique  | Cattle  | MG993380 | Unpublished           |
| Mexico      | Calves  | EF644348 | Genis et al., 2008    |
| Mexico      | Calves  | EF644347 | Genis et al., 2008    |
| Mexico      | Calves  | EF644346 | Genis et al., 2008    |
| Mexico      | Calves  | EF644345 | Genis et al., 2008    |
| Mexico      | Calves  | EF644344 | Genis et al., 2008    |
| Mexico      | Calves  | EF644343 | Genis et al., 2008    |
| Mexico      | Calves  | EF644342 | Genis et al., 2008    |
| Mexico      | Calves  | EF644341 | Genis et al., 2008    |
| Mexico      | Calves  | EF644340 | Genis et al., 2008    |
| Mexico      | Calves  | EF644339 | Genis et al., 2008    |
| Mexico      | Calves  | EF644338 | Genis et al., 2008    |
| Mexico      | Calves  | EF644337 | Genis et al., 2008    |
| Mexico      | Calves  | EF644336 | Genis et al., 2008    |
| Vietnam     | Buffalo | LC004338 | Yokoyama et al., 2015 |
| Vietnam     | Buffalo | LC004337 | Yokoyama et al., 2015 |
| Vietnam     | Buffalo | LC004336 | Yokoyama et al., 2015 |
| Vietnam     | Buffalo | LC004335 | Yokoyama et al., 2015 |
| Vietnam     | Buffalo | LC004334 | Yokoyama et al., 2015 |
| Vietnam     | Buffalo | LC004333 | Yokoyama et al., 2015 |
| Vietnam     | Buffalo | LC004332 | Yokoyama et al., 2015 |
| Vietnam     | Buffalo | LC004331 | Yokoyama et al., 2015 |
| Vietnam     | Buffalo | LC004330 | Yokoyama et al., 2015 |
| Vietnam     | Cattle  | LC004329 | Yokoyama et al., 2015 |
| Vietnam     | Cattle  | LC004328 | Yokoyama et al., 2015 |
| Vietnam     | Cattle  | LC004327 | Yokoyama et al., 2015 |
| Vietnam     | Cattle  | LC004326 | Yokoyama et al., 2015 |

|             |                      |          |                          |
|-------------|----------------------|----------|--------------------------|
| Vietnam     | Cattle               | LC004325 | Yokoyama et al., 2015    |
| Vietnam     | Cattle               | LC004324 | Yokoyama et al., 2015    |
| Vietnam     | Cattle               | LC004323 | Yokoyama et al., 2015    |
| Vietnam     | Cattle               | LC004322 | Yokoyama et al., 2015    |
| Vietnam     | Cattle               | LC004321 | Yokoyama et al., 2015    |
| Vietnam     | Cattle               | LC004320 | Yokoyama et al., 2015    |
| Vietnam     | Cattle               | LC004319 | Yokoyama et al., 2015    |
| Vietnam     | Cattle               | LC004318 | Yokoyama et al., 2015    |
| Vietnam     | Cattle               | LC004317 | Yokoyama et al., 2015    |
| Vietnam     | Cattle               | LC004316 | Yokoyama et al., 2015    |
| Vietnam     | Cattle               | LC004315 | Yokoyama et al., 2015    |
| Vietnam     | Cattle               | LC004314 | Yokoyama et al., 2015    |
| Vietnam     | Cattle               | LC004313 | Yokoyama et al., 2015    |
| Vietnam     | Cattle               | LC004312 | Yokoyama et al., 2015    |
| Vietnam     | Cattle               | LC004311 | Yokoyama et al., 2015    |
| Vietnam     | Cattle               | LC004310 | Yokoyama et al., 2015    |
| Vietnam     | Cattle               | LC004309 | Yokoyama et al., 2015    |
| Vietnam     | Cattle               | LC004308 | Yokoyama et al., 2015    |
| Vietnam     | Cattle               | LC004307 | Yokoyama et al., 2015    |
| Israel      | R. annulatus<br>tick | KJ152553 | Molad et al., 2014       |
| Israel      | R. annulatus<br>tick | KJ152552 | Molad et al., 2014       |
| Israel      | Cattle               | KJ152551 | Molad et al., 2014       |
| Israel      | Cattle               | KJ152550 | Molad et al., 2014       |
| Israel      | Cattle               | KJ152549 | Molad et al., 2014       |
| Israel      | Cattle               | KJ152548 | Molad et al., 2014       |
| Sri Lanka   | Cattle               | AB787631 | Sivakumar et al., 2013   |
| Sri Lanka   | Cattle               | AB787630 | Sivakumar et al., 2013   |
| Sri Lanka   | Cattle               | AB787629 | Sivakumar et al., 2013   |
| Sri Lanka   | Cattle               | AB787628 | Sivakumar et al., 2013   |
| Sri Lanka   | Cattle               | AB787627 | Sivakumar et al., 2013   |
| Sri Lanka   | Cattle               | AB787626 | Sivakumar et al., 2013   |
| Sri Lanka   | Cattle               | AB787625 | Sivakumar et al., 2013   |
| Sri Lanka   | Cattle               | AB787624 | Sivakumar et al., 2013   |
| Sri Lanka   | Cattle               | AB787623 | Sivakumar et al., 2013   |
| Sri Lanka   | Cattle               | AB787622 | Sivakumar et al., 2013   |
| Sri Lanka   | Cattle               | AB787621 | Sivakumar et al., 2013   |
| Sri Lanka   | Cattle               | AB787620 | Sivakumar et al., 2013   |
| Sri Lanka   | Cattle               | AB787619 | Sivakumar et al., 2013   |
| Sri Lanka   | Cattle               | AB787618 | Sivakumar et al., 2013   |
| Sri Lanka   | Cattle               | AB787617 | Sivakumar et al., 2013   |
| Sri Lanka   | Cattle               | AB787616 | Sivakumar et al., 2013   |
| Sri Lanka   | Cattle               | AB787615 | Sivakumar et al., 2013   |
| Sri Lanka   | Cattle               | AB787614 | Sivakumar et al., 2013   |
| Philippines | Cattle               | AB819791 | Tattiyapong et al., 2014 |
| Philippines | Cattle               | AB819790 | Tattiyapong et al., 2014 |
| Philippines | Cattle               | AB819789 | Tattiyapong et al., 2014 |
| Philippines | Cattle               | AB819788 | Tattiyapong et al., 2014 |
| Philippines | Cattle               | AB819787 | Tattiyapong et al., 2014 |

|             |                      |          |                          |
|-------------|----------------------|----------|--------------------------|
| Philippines | Cattle               | AB819786 | Tattiyapong et al., 2014 |
| Philippines | Cattle               | AB819785 | Tattiyapong et al., 2014 |
| Philippines | Cattle               | AB819784 | Tattiyapong et al., 2014 |
| Philippines | Cattle               | AB819783 | Tattiyapong et al., 2014 |
| Philippines | Cattle               | AB819782 | Tattiyapong et al., 2014 |
| Philippines | Cattle               | AB819781 | Tattiyapong et al., 2014 |
| Philippines | Cattle               | AB819780 | Tattiyapong et al., 2014 |
| Philippines | Cattle               | AB819779 | Tattiyapong et al., 2014 |
| Philippines | Cattle               | AB819778 | Tattiyapong et al., 2014 |
| Brazil      | Bovine               | OP361308 | Unpublished              |
| Argentina   | Strain M2P           | FJ422805 | Dominguez et al., 2010   |
| Mexico      | Tabasco strain       | FJ422803 | Dominguez et al., 2010   |
| Mexico      | Strain RAD2          | FJ422802 | Dominguez et al., 2010   |
| Mexico      | Strain RAD1          | FJ422801 | Dominguez et al., 2010   |
| Vietnam     | Cattle               | AB786924 | Sivakumar et al., 2013   |
| Vietnam     | Buffalo              | AB786923 | Sivakumar et al., 2013   |
| Vietnam     | Cattle               | AB786922 | Sivakumar et al., 2013   |
| Vietnam     | Cattle               | AB786921 | Sivakumar et al., 2013   |
| Vietnam     | Cattle               | AB786920 | Sivakumar et al., 2013   |
| China       | Cattle               | MT113057 | Wang et al., 2020        |
| China       | Cattle               | MT113056 | Wang et al., 2020        |
| China       | Cattle               | MT113055 | Wang et al., 2020        |
| China       | Cattle               | MT113054 | Wang et al., 2020        |
| China       | Cattle               | MT113053 | Wang et al., 2020        |
| China       | Cattle               | MT113052 | Wang et al., 2020        |
| China       | Cattle               | MT113051 | Wang et al., 2020        |
| Brazil      | Cattle               | KU522562 | Unpublished              |
| Brazil      | Cattle               | KU522561 | Unpublished              |
| Brazil      | Cattle               | KU522560 | Unpublished              |
| Brazil      | Cattle               | KU522559 | Unpublished              |
| Brazil      | Cattle               | KU522558 | Unpublished              |
| Brazil      | Cattle               | KU522557 | Unpublished              |
| Brazil      | Cattle               | KU522556 | Unpublished              |
| Brazil      | Cattle               | KU522552 | Unpublished              |
| Israel      | R. annulatus<br>tick | KJ467626 | Molad et al., 2014       |

#### MSA-2c isolates

|          |                       |          |                         |
|----------|-----------------------|----------|-------------------------|
| Brazil   | Cattle                | KX420674 | Matos et al., 2017      |
| Brazil   | Cattle                | KX420673 | Matos et al., 2017      |
| Brazil   | Cattle                | KX420672 | Matos et al., 2017      |
| Israel   | R. annulatus<br>ticks | KJ144257 | Molad et al., 2014      |
| Israel   | Calf                  | KJ144256 | Molad et al., 2014      |
| Israel   | Cattle                | KJ144255 | Molad et al., 2014      |
| Israel   | Calf                  | KJ144254 | Molad et al., 2014      |
| Israel   | R. annulatus<br>ticks | KJ144253 | Molad et al., 2014      |
| Mongolia | Cattle                | AB612260 | Altangerel et al., 2012 |
| Mongolia | Cattle                | AB612259 | Altangerel et al., 2012 |
| Mongolia | Cattle                | AB612258 | Altangerel et al., 2012 |

|          |         |          |                         |
|----------|---------|----------|-------------------------|
| Mongolia | Cattle  | AB612257 | Altangerel et al., 2012 |
| Mongolia | Cattle  | AB612256 | Altangerel et al., 2012 |
| Mongolia | Cattle  | AB612255 | Altangerel et al., 2012 |
| Mongolia | Cattle  | AB612254 | Altangerel et al., 2012 |
| Mongolia | Cattle  | AB612253 | Altangerel et al., 2012 |
| Mongolia | Cattle  | AB612252 | Altangerel et al., 2012 |
| Mexico   | Cattle  | EF640967 | Borgonio et al., 2008   |
| Mexico   | Cattle  | EF640966 | Borgonio et al., 2008   |
| Mexico   | Cattle  | EF640965 | Borgonio et al., 2008   |
| Mexico   | Cattle  | EF640964 | Borgonio et al., 2008   |
| Mexico   | Cattle  | EF640963 | Borgonio et al., 2008   |
| Mexico   | Cattle  | EF640962 | Borgonio et al., 2008   |
| Mexico   | Cattle  | EF640961 | Borgonio et al., 2008   |
| Mexico   | Cattle  | EF640960 | Borgonio et al., 2008   |
| Mexico   | Cattle  | EF640959 | Borgonio et al., 2008   |
| Mexico   | Cattle  | EF640958 | Borgonio et al., 2008   |
| Mexico   | Cattle  | EF640957 | Borgonio et al., 2008   |
| Mexico   | Cattle  | EF640956 | Borgonio et al., 2008   |
| Mexico   | Cattle  | EF640955 | Borgonio et al., 2008   |
| Brazil   | Cattle  | MK305092 | Mendes et al., 2019     |
| Brazil   | Cattle  | MK305091 | Mendes et al., 2019     |
| Brazil   | Cattle  | MK305090 | Mendes et al., 2019     |
| Brazil   | Cattle  | MH751591 | Mendes et al., 2019     |
| Brazil   | Cattle  | MH751590 | Mendes et al., 2019     |
| Brazil   | Cattle  | MH751589 | Mendes et al., 2019     |
| Brazil   | Cattle  | MH751588 | Mendes et al., 2019     |
| Brazil   | Cattle  | MH751587 | Mendes et al., 2019     |
| Brazil   | Calves  | KX463635 | Matos et al., 2020      |
| Brazil   | Calves  | KX463634 | Matos et al., 2020      |
| Brazil   | Calves  | KX463633 | Matos et al., 2020      |
| Brazil   | Calves  | KX463632 | Matos et al., 2020      |
| Turkey   | Cattle  | GU647154 | Duzlu et al., 2011      |
| Turkey   | Cattle  | GU647153 | Duzlu et al., 2011      |
| Turkey   | Cattle  | GU647152 | Duzlu et al., 2011      |
| Turkey   | Cattle  | GU647151 | Duzlu et al., 2011      |
| Turkey   | Cattle  | GU647150 | Duzlu et al., 2011      |
| Turkey   | Cattle  | GU647149 | Duzlu et al., 2011      |
| Turkey   | Cattle  | GU647148 | Duzlu et al., 2011      |
| Turkey   | Cattle  | GU647147 | Duzlu et al., 2011      |
| Turkey   | Cattle  | GU357634 | Duzlu et al., 2011      |
| Turkey   | Cattle  | GU004533 | Duzlu et al., 2011      |
| Turkey   | Cattle  | KC515392 | Duzlu et al., 2015      |
| Turkey   | Cattle  | KC515391 | Duzlu et al., 2015      |
| Turkey   | Cattle  | KC515390 | Duzlu et al., 2015      |
| Turkey   | Cattle  | KC515389 | Duzlu et al., 2015      |
| Vietnam  | Buffalo | LC004373 | Yokoyama et al., 2015   |
| Vietnam  | Buffalo | LC004372 | Yokoyama et al., 2015   |
| Vietnam  | Buffalo | LC004371 | Yokoyama et al., 2015   |
| Vietnam  | Buffalo | LC004370 | Yokoyama et al., 2015   |
| Vietnam  | Buffalo | LC004369 | Yokoyama et al., 2015   |

|             |         |          |                          |
|-------------|---------|----------|--------------------------|
| Vietnam     | Buffalo | LC004368 | Yokoyama et al., 2015    |
| Vietnam     | Buffalo | LC004367 | Yokoyama et al., 2015    |
| Vietnam     | Buffalo | LC004366 | Yokoyama et al., 2015    |
| Vietnam     | Buffalo | LC004365 | Yokoyama et al., 2015    |
| Vietnam     | Buffalo | LC004364 | Yokoyama et al., 2015    |
| Vietnam     | Buffalo | LC004363 | Yokoyama et al., 2015    |
| Vietnam     | Cattle  | LC004362 | Yokoyama et al., 2015    |
| Vietnam     | Cattle  | LC004361 | Yokoyama et al., 2015    |
| Vietnam     | Cattle  | LC004360 | Yokoyama et al., 2015    |
| Vietnam     | Cattle  | LC004359 | Yokoyama et al., 2015    |
| Vietnam     | Cattle  | LC004358 | Yokoyama et al., 2015    |
| Vietnam     | Cattle  | LC004357 | Yokoyama et al., 2015    |
| Vietnam     | Cattle  | LC004356 | Yokoyama et al., 2015    |
| Vietnam     | Cattle  | LC004355 | Yokoyama et al., 2015    |
| Vietnam     | Cattle  | LC004354 | Yokoyama et al., 2015    |
| Vietnam     | Cattle  | LC004353 | Yokoyama et al., 2015    |
| Vietnam     | Cattle  | LC004352 | Yokoyama et al., 2015    |
| Vietnam     | Cattle  | LC004351 | Yokoyama et al., 2015    |
| Vietnam     | Cattle  | LC004350 | Yokoyama et al., 2015    |
| Vietnam     | Cattle  | LC004349 | Yokoyama et al., 2015    |
| Vietnam     | Cattle  | LC004348 | Yokoyama et al., 2015    |
| Vietnam     | Cattle  | LC004347 | Yokoyama et al., 2015    |
| Vietnam     | Cattle  | LC004346 | Yokoyama et al., 2015    |
| Vietnam     | Cattle  | LC004345 | Yokoyama et al., 2015    |
| Vietnam     | Cattle  | LC004344 | Yokoyama et al., 2015    |
| Vietnam     | Cattle  | LC004343 | Yokoyama et al., 2015    |
| Vietnam     | Cattle  | LC004342 | Yokoyama et al., 2015    |
| Vietnam     | Cattle  | LC004341 | Yokoyama et al., 2015    |
| Vietnam     | Cattle  | LC004340 | Yokoyama et al., 2015    |
| Vietnam     | Cattle  | LC004339 | Yokoyama et al., 2015    |
| Sri Lanka   | Cattle  | AB787599 | Sivakumar et al., 2013   |
| Sri Lanka   | Cattle  | AB787598 | Sivakumar et al., 2013   |
| Sri Lanka   | Cattle  | AB787597 | Sivakumar et al., 2013   |
| Sri Lanka   | Cattle  | AB787596 | Sivakumar et al., 2013   |
| Sri Lanka   | Cattle  | AB787595 | Sivakumar et al., 2013   |
| Sri Lanka   | Cattle  | AB787594 | Sivakumar et al., 2013   |
| Sri Lanka   | Cattle  | AB787593 | Sivakumar et al., 2013   |
| Sri Lanka   | Cattle  | AB787592 | Sivakumar et al., 2013   |
| Sri Lanka   | Cattle  | AB787591 | Sivakumar et al., 2013   |
| Sri Lanka   | Cattle  | AB787590 | Sivakumar et al., 2013   |
| Sri Lanka   | Cattle  | AB787589 | Sivakumar et al., 2013   |
| Sri Lanka   | Cattle  | AB787588 | Sivakumar et al., 2013   |
| Sri Lanka   | Cattle  | AB787587 | Sivakumar et al., 2013   |
| Sri Lanka   | Cattle  | AB787586 | Sivakumar et al., 2013   |
| Sri Lanka   | Cattle  | AB787585 | Sivakumar et al., 2013   |
| Sri Lanka   | Cattle  | AB787584 | Sivakumar et al., 2013   |
| Sri Lanka   | Cattle  | AB787583 | Sivakumar et al., 2013   |
| Sri Lanka   | Cattle  | AB787582 | Sivakumar et al., 2013   |
| Philippines | Cattle  | AB819805 | Tattiyapong et al., 2014 |
| Philippines | Cattle  | AB819804 | Tattiyapong et al., 2014 |

|             |                       |          |                                    |
|-------------|-----------------------|----------|------------------------------------|
| Philippines | Cattle                | AB819803 | Tattiyapong et al., 2014           |
| Philippines | Cattle                | AB819802 | Tattiyapong et al., 2014           |
| Philippines | Cattle                | AB819801 | Tattiyapong et al., 2014           |
| Philippines | Cattle                | AB819800 | Tattiyapong et al., 2014           |
| Philippines | Cattle                | AB819799 | Tattiyapong et al., 2014           |
| Philippines | Cattle                | AB819798 | Tattiyapong et al., 2014           |
| Philippines | Cattle                | AB819797 | Tattiyapong et al., 2014           |
| Philippines | Cattle                | AB819796 | Tattiyapong et al., 2014           |
| Philippines | Cattle                | AB819795 | Tattiyapong et al., 2014           |
| Philippines | Cattle                | AB819794 | Tattiyapong et al., 2014           |
| Philippines | Cattle                | AB819793 | Tattiyapong et al., 2014           |
| Philippines | Cattle                | AB819792 | Tattiyapong et al., 2014           |
| Turkey      | Bovine                | HM117270 | Yavuz et al., 2011                 |
| Brazil      | Bovine                | OP361309 | Unpublished                        |
| Argentina   | Strain M2P            | FJ411372 | Dominguez el al., 2010             |
| Mexico      | Strain Veracruz       | FJ422800 | Dominguez el al., 2010             |
| Mexico      | Strain RAD            | FJ422799 | Dominguez el al., 2010             |
| Mexico      | Strain Tabasco        | FJ422798 | Dominguez el al., 2010             |
| Mexico      | Strain Pullman        | FJ422797 | Dominguez el al., 2010             |
| Argentina   | Strain S2P            | FJ422796 | Dominguez el al., 2010             |
| Argentina   | Strain M1A            | FJ422795 | Dominguez el al., 2010             |
| Argentina   | Strain M3P            | FJ422794 | Dominguez el al., 2010             |
| China       | Cattle                | MT113065 | Wang et al., 2020                  |
| China       | Cattle                | MT113064 | Wang et al., 2020                  |
| China       | Cattle                | MT113063 | Wang et al., 2020                  |
| China       | Cattle                | MT113062 | Wang et al., 2020                  |
| China       | Cattle                | MT113061 | Wang et al., 2020                  |
| China       | Cattle                | MT113060 | Wang et al., 2020                  |
| China       | Cattle                | MT113059 | Wang et al., 2020                  |
| China       | Cattle                | MT113058 | Wang et al., 2020                  |
| Brazil      | Cattle                | KU522567 | Matos et al., 2017                 |
| Brazil      | Cattle                | KU522566 | Matos et al., 2017                 |
| Brazil      | Cattle                | KU522565 | Matos et al., 2017                 |
| Brazil      | Cattle                | KU522564 | Matos et al., 2017                 |
| Brazil      | Cattle                | KU522563 | Matos et al., 2017                 |
| Israel      | R. annulatus<br>ticks | KJ467627 | Molad et al., 2014                 |
| Argentina   | Strain R1A            | AY052542 | Florin-Christensen et al.,<br>2002 |

---

**Supplementary Table S2.** Genetic indices among different populations of *Babesia bovis* calculated after amplification of the MSA-1 gene. Numbers of the tested isolates from each population are given in parenthesis.

| Population 1                     | Population 2       | Fst     | Gst     | Kxy       | Nm    | Dxy     | Da      |
|----------------------------------|--------------------|---------|---------|-----------|-------|---------|---------|
| <b>Continent-related indices</b> |                    |         |         |           |       |         |         |
| South America (17)               | Africa (7)         | 0.09163 | 0.04131 | 129.21010 | 5.80  | 0.22668 | 0.02077 |
| South America                    | North America (13) | 0.05487 | 0.02362 | 153.28050 | 10.34 | 0.26611 | 0.01460 |
| South America                    | Australia (13)     | 0.14179 | 0.01702 | 229.32130 | 14.44 | 0.40877 | 0.05796 |
| South America                    | Asia (146)         | 0.24756 | 0.01218 | 245.74580 | 20.27 | 0.45008 | 0.11142 |
| Africa                           | North America      | 0.06665 | 0.05045 | 117.36260 | 4.71  | 0.16369 | 0.01091 |
| Africa                           | Australia          | 0.37539 | 0.05045 | 218.87910 | 4.71  | 0.39438 | 0.14805 |
| Africa                           | Asia               | 0.51057 | 0.03669 | 263.01170 | 6.56  | 0.48171 | 0.24595 |
| North America                    | Australia          | 0.23367 | 0.04348 | 216.50890 | 5.50  | 0.36266 | 0.08474 |
| North America                    | Asia               | 0.42885 | 0.02374 | 267.90200 | 10.28 | 0.45562 | 0.19539 |
| Australia                        | Asia               | 0.16913 | 0.01819 | 251.61850 | 13.50 | 0.43684 | 0.07388 |
| <b>Country-related indices</b>   |                    |         |         |           |       |         |         |
| Sri Lanka (8)                    | Brazil (17)        | 0.32390 | 0.00751 | 266.38240 | 33.05 | 0.46981 | 0.15217 |
| Sri Lanka                        | Mongolia (8)       | 0.64779 | 0.00901 | 324.98440 | 27.50 | 0.47512 | 0.30778 |
| Sri Lanka                        | Thailand (98)      | 0.02594 | 0.02144 | 178.34820 | 11.41 | 0.29725 | 0.00771 |
| Sri Lanka                        | Ghana (7)          | 0.56113 | 0.03697 | 315.00000 | 6.51  | 0.50971 | 0.28601 |
| Sri Lanka                        | Mexico (13)        | 0.48915 | 0.01512 | 310.12500 | 16.28 | 0.48533 | 0.23740 |
| Sri Lanka                        | Australia (13)     | 0.25901 | 0.01201 | 267.29810 | 20.57 | 0.45692 | 0.11834 |
| Sri Lanka                        | China (13)         | 0.49019 | 0.02465 | 332.64420 | 9.89  | 0.51097 | 0.25048 |
| Sri Lanka                        | Philippines (10)   | 0.08173 | 0.01748 | 206.41250 | 14.05 | 0.32302 | 0.02640 |
| Sri Lanka                        | Vietnam (9)        | 0.05428 | 0.00718 | 200.22220 | 34.59 | 0.30615 | 0.01662 |
| Brazil                           | Mongolia           | 0.19140 | 0.00890 | 115.84560 | 27.85 | 0.20008 | 0.03829 |
| Brazil                           | Thailand           | 0.33134 | 0.01194 | 266.99400 | 20.68 | 0.47848 | 0.15854 |
| Brazil                           | Ghana              | 0.09163 | 0.04131 | 129.21010 | 5.80  | 0.22668 | 0.02077 |
| Brazil                           | Mexico             | 0.05487 | 0.02362 | 153.28050 | 10.34 | 0.26611 | 0.01460 |
| Brazil                           | Australia          | 0.14179 | 0.01702 | 229.32130 | 14.44 | 0.40877 | 0.05796 |
| Brazil                           | China              | 0.30973 | 0.04477 | 209.10860 | 5.33  | 0.36880 | 0.11423 |

|             |             |         |           |           |       |         |         |
|-------------|-------------|---------|-----------|-----------|-------|---------|---------|
| Brazil      | Philippines | 0.40626 | 0.01458   | 287.07650 | 16.89 | 0.50631 | 0.20569 |
| Brazil      | Vietnam     | 0.40972 | 0.01195   | 282.70590 | 20.68 | 0.49081 | 0.20110 |
| Mongolia    | Thailand    | 0.67668 | 0.02956   | 298.16960 | 8.21  | 0.49695 | 0.33628 |
| Mongolia    | Ghana       | 0.03313 | 0.04663   | 49.23214  | 5.11  | 0.06461 | 0.00214 |
| Mongolia    | Mexico      | 0.20117 | 0.02377   | 106.54810 | 10.27 | 0.13252 | 0.02666 |
| Mongolia    | Australia   | 0.48748 | 0.02929   | 229.93270 | 8.29  | 0.38131 | 0.18588 |
| Mongolia    | China       | 0.65981 | 0.02060   | 288.77880 | 11.89 | 0.35131 | 0.23180 |
| Mongolia    | Philippines | 0.72685 | 0.02666   | 346.12500 | 9.13  | 0.54167 | 0.39371 |
| Mongolia    | Vietnam     | 0.72977 | 0.01627   | 351.90280 | 15.12 | 0.52366 | 0.38216 |
| Thailand    | Ghana       | 0.59038 | 0.03785   | 294.05540 | 6.35  | 0.52698 | 0.31112 |
| Thailand    | Mexico      | 0.51095 | 0.02675   | 299.26220 | 9.10  | 0.49877 | 0.25485 |
| Thailand    | Australia   | 0.24493 | 0.01849   | 260.56280 | 13.27 | 0.45237 | 0.11080 |
| Thailand    | China       | 0.51109 | 0.02901   | 295.29280 | 8.37  | 0.50220 | 0.25667 |
| Thailand    | Philippines | 0.04655 | 0.02200   | 182.13060 | 11.11 | 0.30355 | 0.01413 |
| Thailand    | Vietnam     | 0.04267 | 175.65310 | 183.49140 | 10.44 | 0.29276 | 0.01249 |
| Ghana       | Mexico      | 0.06665 | 0.05045   | 117.36260 | 4.71  | 0.16369 | 0.01091 |
| Ghana       | Australia   | 0.37539 | 0.05045   | 218.87910 | 4.71  | 0.39438 | 0.14805 |
| Ghana       | China       | 0.52850 | 0.06041   | 261.02200 | 3.89  | 0.35369 | 0.18692 |
| Ghana       | Philippines | 0.64967 | 0.05496   | 330.87140 | 4.30  | 0.56851 | 0.36934 |
| Ghana       | Vietnam     | 0.65684 | 0.04447   | 330.46030 | 5.37  | 0.55633 | 0.36542 |
| Mexico      | Australia   | 0.23367 | 0.04348   | 216.50890 | 5.50  | 0.36266 | 0.08474 |
| Mexico      | China       | 0.31346 | 0.02295   | 238.91720 | 10.64 | 0.30397 | 0.09528 |
| Mexico      | Philippines | 0.57520 | 0.05128   | 327.49230 | 4.63  | 0.53512 | 0.30780 |
| Mexico      | Vietnam     | 0.58129 | 0.04110   | 327.29910 | 5.83  | 0.52201 | 0.30344 |
| Australia   | China       | 0.10431 | 0.02717   | 194.44970 | 8.95  | 0.32087 | 0.03347 |
| Australia   | Philippines | 0.29284 | 0.02721   | 270.62310 | 8.94  | 0.45791 | 0.13409 |
| Australia   | Vietnam     | 0.32054 | 0.01781   | 282.75210 | 13.79 | 0.46891 | 0.15030 |
| China       | Philippines | 0.55684 | 0.04078   | 337.82310 | 5.88  | 0.53623 | 0.29859 |
| China       | Vietnam     | 0.56048 | 0.03093   | 342.68370 | 7.83  | 0.53129 | 0.29778 |
| Philippines | Vietnam     | 0.06719 | 0.02428   | 193.63330 | 10.05 | 0.29608 | 0.01989 |

Fst, Wright's F-statistics for pairwise genetic distance; Gst, genetic differentiation index based on the frequency of haplotypes; Nm, gene flow value; Kxy, average proportion of nucleotide differences between populations; Dxy, average number of nucleotide substitutions per site between populations; Da, number of net nucleotide substitutions per site between populations.



**Supplementary Table S3.** Genetic indices among different populations of *Babesia bovis* calculated after amplification of the MSA-2a1 fragment of the MSA-2 gene. Numbers of the tested isolates from each population are given in parenthesis.

| Population 1                   | Population 2  | Fst     | Gst     | Kxy       | Nm    | Dxy     | Da      |
|--------------------------------|---------------|---------|---------|-----------|-------|---------|---------|
| <b>Country-related indices</b> |               |         |         |           |       |         |         |
| Sri Lanka (11)                 | Mexico (2)    | 0.25088 | 0.06821 | 79.86364  | 3.41  | 0.11046 | 0.02771 |
| Sri Lanka                      | Argentina (4) | 0.19120 | 0.02168 | 58.00000  | 11.28 | 0.08022 | 0.01534 |
| Sri Lanka                      | Israel (7)    | 0.15370 | 0.00720 | 98.03896  | 34.46 | 0.13560 | 0.02084 |
| Mexico                         | Argentina     | 0.60273 | 0.02041 | 116.00000 | 12.00 | 0.16044 | 0.09670 |
| Mexico                         | Israel        | -       | 0.04726 | 74.78571  | 5.04  | 0.10344 | -       |
|                                |               | 0.09838 |         |           |       |         | 0.01018 |
| Argentina                      | Israel        | 0.40396 | 0.00725 | 116.14290 | 34.22 | 0.16064 | 0.06489 |

Fst, Wright's F-statistics for pairwise genetic distance; Gst, genetic differentiation index based on the frequency of haplotypes; Nm, gene flow value; Kxy, average proportion of nucleotide differences between populations; Dxy, average number of nucleotide substitutions per site between populations; Da, number of net nucleotide substitutions per site between populations.

**Supplementary Table S4.** Genetic indices among different populations of *Babesia bovis* calculated after amplification of the MSA-2b region of the MSA-2 gene. Numbers of the tested isolates from each population are given in parenthesis.

| Population 1                      | Population 2       | Fst     | Gst     | Kxy      | Nm    | Dxy     | Da      |
|-----------------------------------|--------------------|---------|---------|----------|-------|---------|---------|
| <b>Host-related indices</b>       |                    |         |         |          |       |         |         |
| Cattle (176)                      | Water buffalo (10) | 0.04398 | 0.02210 | 76.85114 | 11.06 | 0.19261 | 0.00847 |
| Cattle                            | Ticks (7)          | 0.00088 | 0.03317 | 69.10958 | 7.29  | 0.17364 | 0.00015 |
| Water buffalo                     | Ticks              | 0.10223 | 0.01901 | 81.68571 | 12.90 | 0.20070 | 0.02052 |
| <b>Continents-related indices</b> |                    |         |         |          |       |         |         |
| North America (48)                | Asia (106)         | 0.04874 | 0.00753 | 75.06387 | 32.93 | 0.18443 | 0.00899 |
| North America                     | South America (19) | 0.15886 | 0.01782 | 79.84430 | 13.78 | 0.20061 | 0.03187 |
| North America                     | Africa (20)        | 0.03293 | 0.01574 | 73.74895 | 15.64 | 0.18120 | 0.00597 |
| Asia                              | South America      | 0.06888 | 0.01391 | 74.81132 | 17.72 | 0.18750 | 0.01291 |
| Asia                              | Africa             | 0.01275 | 0.00869 | 74.79151 | 28.51 | 0.18331 | 0.00234 |
| South America                     | Africa             | 0.05990 | 0.01730 | 74.16842 | 14.20 | 0.18589 | 0.01113 |
| <b>Country-related indices</b>    |                    |         |         |          |       |         |         |
| Puerto Rico (18)                  | China (7)          | -       | 0.02436 | 76.53175 | 10.01 | 0.18758 | -       |
|                                   |                    | 0.01757 |         |          |       |         | 0.00330 |
| Puerto Rico                       | Mexico (27)        | 0.25877 | 0.01279 | 83.50617 | 19.30 | 0.20517 | 0.05309 |
| Puerto Rico                       | USA (3)            | 0.06224 | 0.08837 | 79.38889 | 2.58  | 0.19458 | 0.01211 |
| Puerto Rico                       | Thailand (23)      | 0.18954 | 0.01261 | 82.30676 | 19.58 | 0.20173 | 0.03824 |
| Puerto Rico                       | Sri Lanka (18)     | 0.11316 | 0.01078 | 79.14198 | 22.93 | 0.19398 | 0.02195 |
| Puerto Rico                       | Vietnam (37)       | 0.09372 | 0.01303 | 85.16817 | 18.94 | 0.20875 | 0.01956 |
| Puerto Rico                       | Israel (7)         | 0.07176 | 0.02120 | 78.58730 | 11.54 | 0.19262 | 0.01382 |
| Puerto Rico                       | South Africa (11)  | 0.00896 | 0.02343 | 75.31313 | 10.42 | 0.18459 | 0.00165 |
| Puerto Rico                       | Philippines (14)   | 0.19642 | 0.03210 | 83.52381 | 7.54  | 0.20472 | 0.04021 |
| Puerto Rico                       | Brazil (18)        | 0.07105 | 0.01923 | 76.24383 | 12.75 | 0.19109 | 0.01358 |
| Puerto Rico                       | Mozambique (9)     | -       | 0.02378 | 77.98148 | 10.26 | 0.19113 | -       |
|                                   |                    | 0.00794 |         |          |       |         | 0.00152 |
| China                             | Mexico             | 0.28225 | 0.03008 | 84.91534 | 8.06  | 0.20864 | 0.05889 |
| China                             | USA                | 0.07499 | 0.10020 | 79.38095 | 2.25  | 0.19456 | 0.01459 |
| China                             | Thailand           | 0.19674 | 0.01988 | 81.77640 | 12.33 | 0.20043 | 0.03943 |
| China                             | Sri Lanka          | 0.15223 | 0.03132 | 81.58730 | 7.73  | 0.19997 | 0.03044 |
| China                             | Vietnam            | 0.03774 | 0.02840 | 79.15444 | 8.55  | 0.19401 | 0.00732 |
| China                             | Israel             | 0.12107 | 0.02439 | 81.83673 | 10.00 | 0.20058 | 0.02428 |
| China                             | South Africa       | -       | 0.00701 | 69.40260 | 35.42 | 0.17010 | -       |
|                                   |                    | 0.06076 |         |          |       |         | 0.01034 |

|              |              |         |         |          |       |         |         |
|--------------|--------------|---------|---------|----------|-------|---------|---------|
| China        | Philippines  | 0.16038 | 0.00679 | 78.72449 | 36.56 | 0.19295 | 0.03095 |
| China        | Brazil       | 0.04343 | 0.03706 | 73.50000 | 6.50  | 0.18421 | 0.00800 |
| China        | Mozambique   | -       | 0.01845 | 77.52381 | 13.30 | 0.19001 | -       |
|              |              | 0.00074 |         |          |       |         | 0.00014 |
| Mexico       | USA          | 0.11868 | 0.08134 | 65.04939 | 2.82  | 0.15983 | 0.01897 |
| Mexico       | Thailand     | 0.06182 | 0.01392 | 52.95813 | 17.71 | 0.13012 | 0.00804 |
| Mexico       | Sri Lanka    | 0.16624 | 0.00575 | 63.74691 | 43.21 | 0.15663 | 0.02604 |
| Mexico       | Vietnam      | 0.29164 | 0.01997 | 85.07207 | 1.17  | 0.20902 | 0.06096 |
| Mexico       | Israel       | 0.24448 | 0.02494 | 74.02116 | 1.50  | 0.18187 | 0.04446 |
| Mexico       | South Africa | 0.21283 | 0.02979 | 73.17171 | 8.14  | 0.17978 | 0.03826 |
| Mexico       | Philippines  | 0.13556 | 0.03538 | 57.92064 | 6.82  | 0.14231 | 0.01929 |
| Mexico       | Brazil       | 0.36377 | 0.02749 | 85.29836 | 8.84  | 0.21432 | 0.07796 |
| Mexico       | Mozambique   | 0.12976 | 0.03308 | 70.74486 | 7.31  | 0.17382 | 0.02255 |
| USA          | Thailand     | 0.16080 | 0.08681 | 74.18841 | 2.55  | 0.18183 | 0.02924 |
| USA          | Sri Lanka    | 0.14130 | 0.09325 | 76.55556 | 2.43  | 0.18764 | 0.02651 |
| USA          | Vietnam      | 0.12115 | 0.08450 | 82.76576 | 2.71  | 0.20286 | 0.02458 |
| USA          | Israel       | 0.13862 | 0.10020 | 79.52381 | 2.25  | 0.19491 | 0.02702 |
| USA          | South Africa | 0.09942 | 0.10160 | 77.93939 | 2.21  | 0.19103 | 0.01899 |
| USA          | Philippines  | 0.20599 | 0.10349 | 78.92857 | 2.17  | 0.19345 | 0.03985 |
| USA          | Brazil       | 0.17589 | 0.09734 | 81.24074 | 2.32  | 0.20361 | 0.03581 |
| USA          | Mozambique   | -       | 0.10654 | 71.92593 | 2.10  | 0.17629 | -       |
|              |              | 0.03096 |         |          |       |         | 0.00546 |
| Thailand     | Sri Lanka    | 0.05714 | 0.01612 | 61.51208 | 15.26 | 0.15076 | 0.00861 |
| Thailand     | Vietnam      | 0.21060 | 0.01067 | 82.33842 | 23.18 | 0.20181 | 0.04250 |
| Thailand     | Israel       | 0.14730 | 0.02645 | 71.25466 | 9.20  | 0.17464 | 0.02572 |
| Thailand     | South Africa | 0.13502 | 0.02641 | 72.19763 | 9.22  | 0.17696 | 0.02389 |
| Thailand     | Philippines  | 0.00767 | 0.01293 | 55.35404 | 19.08 | 0.13567 | 0.00104 |
| Thailand     | Brazil       | 0.27970 | 0.02761 | 81.94927 | 8.80  | 0.20539 | 0.05745 |
| Thailand     | Mozambique   | 0.06672 | 0.01431 | 71.15942 | 17.22 | 0.17441 | 0.01164 |
| Sri Lanka    | Vietnam      | 0.16525 | 0.01776 | 82.03304 | 13.83 | 0.20106 | 0.03322 |
| Sri Lanka    | Israel       | -       | 0.02168 | 61.63492 | 11.28 | 0.15107 | -       |
|              |              | 0.04224 |         |          |       |         | 0.00638 |
| Sri Lanka    | South Africa | 0.11558 | 0.03403 | 74.54546 | 7.10  | 0.18271 | 0.02112 |
| Sri Lanka    | Philippines  | 0.09114 | 0.04079 | 64.26588 | 5.88  | 0.15751 | 0.01436 |
| Sri Lanka    | Brazil       | 0.14016 | 0.01089 | 72.69136 | 22.70 | 0.18218 | 0.02553 |
| Sri Lanka    | Mozambique   | -       | 0.02042 | 69.85185 | 11.99 | 0.17121 | -       |
|              |              | 0.00057 |         |          |       |         | 0.00010 |
| Vietnam      | Israel       | 0.13749 | 0.02738 | 82.59460 | 8.88  | 0.20244 | 0.02783 |
| Vietnam      | South Africa | 0.08175 | 0.02451 | 79.42261 | 9.95  | 0.19466 | 0.01591 |
| Vietnam      | Philippines  | 0.19669 | 0.02232 | 81.42471 | 10.95 | 0.19957 | 0.03925 |
| Vietnam      | Brazil       | 0.05171 | 0.01567 | 73.06757 | 15.70 | 0.18313 | 0.00947 |
| Vietnam      | Mozambique   | 0.03151 | 0.01251 | 79.39339 | 19.73 | 0.19459 | 0.00613 |
| Israel       | South Africa | 0.10686 | 0.03233 | 76.90909 | 7.48  | 0.18850 | 0.02014 |
| Israel       | Philippines  | 0.16299 | 0.03977 | 73.08163 | 6.04  | 0.17912 | 0.02919 |
| Israel       | Brazil       | 0.03821 | 0.02076 | 67.75397 | 11.79 | 0.16981 | 0.00649 |
| Israel       | Mozambique   | -       | 0.01845 | 70.96825 | 13.30 | 0.17394 | -       |
|              |              | 0.02374 |         |          |       |         | 0.00413 |
| South Africa | Philippines  | 0.11697 | 0.04482 | 71.18831 | 5.33  | 0.17448 | 0.02041 |
| South Africa | Brazil       | 0.11650 | 0.04077 | 75.95454 | 5.88  | 0.19036 | 0.02218 |

|              |            |         |         |          |       |         |         |
|--------------|------------|---------|---------|----------|-------|---------|---------|
| South Africa | Mozambique | -       | 0.03564 | 73.97980 | 6.77  | 0.18132 | -       |
|              |            | 0.00492 |         |          |       |         | 0.00089 |
| Philippines  | Brazil     | 0.25931 | 0.04592 | 80.87302 | 5.19  | 0.20269 | 0.05256 |
| Philippines  | Mozambique | 0.07871 | 0.02041 | 72.53175 | 12.00 | 0.17777 | 0.01399 |
| Brazil       | Mozambique | 0.03400 | 0.01236 | 73.24691 | 19.97 | 0.18358 | 0.00624 |

---

Fst, Wright's F-statistics for pairwise genetic distance; Gst, genetic differentiation index based on the frequency of haplotypes; Nm, gene flow value; Kxy, average proportion of nucleotide differences between populations; Dxy, average number of nucleotide substitutions per site between populations; Da, number of net nucleotide substitutions per site between populations.

**Supplementary Table S5.** Genetic indices among different populations of *Babesia bovis* calculated after amplification of the MSA-2c region of the MSA-2 gene. Numbers of the tested isolates from each population are given in parenthesis.

| Population 1                     | Population 2       | Fst     | Gst     | Kxy       | Nm     | Dxy     | Da      |
|----------------------------------|--------------------|---------|---------|-----------|--------|---------|---------|
| <b>Host-related indices</b>      |                    |         |         |           |        |         |         |
| Cattle (134)                     | Water buffalo (11) | 0.18502 | 0.01889 | 53.59227  | 12.98  | 0.08728 | 0.01615 |
| Cattle                           | Ticks (3)          | -       | 0.07228 | 101.16670 | 3.21   | 0.16477 | -       |
|                                  |                    | 0.06390 |         |           |        |         | 0.01053 |
| Water buffalo                    | Ticks              | 0.11556 | 0.03637 | 106.33330 | 6.62   | 0.17206 | 0.01988 |
| <b>Continent-related indices</b> |                    |         |         |           |        |         |         |
| Europe (15)                      | Asia (91)          | 0.25834 | 0.01032 | 61.63663  | 23.98  | 0.09990 | 0.02581 |
| Europe                           | North America (17) | 0.29436 | 0.00565 | 33.98431  | 44.01  | 0.05499 | 0.01619 |
| Europe                           | South America (26) | 0.20110 | 0.00763 | 37.25128  | 32.50  | 0.06057 | 0.01218 |
| Asia                             | North America      | 0.09377 | 0.01101 | 54.48933  | 22.45  | 0.08831 | 0.00828 |
| Asia                             | South America      | 0.06965 | 0.00835 | 58.94886  | 29.71  | 0.09601 | 0.00669 |
| North America                    | South America      | 0.00660 | 0.00141 | 33.49321  | 176.75 | 0.05446 | 0.00036 |
| <b>Country-related indices</b>   |                    |         |         |           |        |         |         |
| Vietnam (35)                     | Philippines (14)   | 0.08368 | 0.00471 | 72.14490  | 52.87  | 0.11674 | 0.00977 |
| Vietnam                          | China (8)          | 0.35890 | 0.02170 | 130.22140 | 11.27  | 0.21071 | 0.07563 |
| Vietnam                          | Mongolia (9)       | 0.52379 | 0.01366 | 36.88254  | 18.05  | 0.05968 | 0.03126 |
| Vietnam                          | Sri Lanka (18)     | 0.23404 | 0.00741 | 60.64444  | 33.47  | 0.09829 | 0.02300 |
| Vietnam                          | Israel (6)         | 0.16555 | 0.02505 | 70.89524  | 9.73   | 0.11472 | 0.01899 |
| Vietnam                          | Turkey (15)        | 0.48379 | 0.00591 | 47.94286  | 42.07  | 0.07758 | 0.03753 |
| Vietnam                          | Mexico (17)        | 0.29188 | 0.00896 | 40.12773  | 27.65  | 0.06493 | 0.01895 |
| Vietnam                          | Brazil (21)        | 0.24742 | 0.01079 | 47.12517  | 22.91  | 0.07663 | 0.01896 |
| Vietnam                          | Argentina (5)      | 0.47421 | 0.04255 | 43.53714  | 5.62   | 0.07045 | 0.03341 |
| Philippines                      | China              | 0.08459 | 0.01447 | 131.53570 | 17.03  | 0.21284 | 0.01800 |
| Philippines                      | Mongolia           | 0.27988 | 0.00477 | 75.66666  | 52.17  | 0.12244 | 0.03427 |
| Philippines                      | Sri Lanka          | 0.07823 | 0.00416 | 90.45238  | 59.84  | 0.14660 | 0.01147 |
| Philippines                      | Israel             | -       | 0.01390 | 71.61111  | 17.74  | 0.11606 | -       |
|                                  |                    | 0.06724 |         |           |        |         | 0.00780 |
| Philippines                      | Turkey             | 0.25468 | 0.00279 | 82.74762  | 89.30  | 0.13390 | 0.03410 |

|             |           |         |         |           |         |         |         |
|-------------|-----------|---------|---------|-----------|---------|---------|---------|
| Philippines | Mexico    | 0.15814 | 0.00647 | 77.61345  | 38.38   | 0.12559 | 0.01986 |
| Philippines | Brazil    | 0.10625 | 0.01031 | 80.38776  | 23.99   | 0.13071 | 0.01389 |
| Philippines | Argentina | 0.24063 | 0.03616 | 78.77143  | 6.66    | 0.12746 | 0.03067 |
| China       | Mongolia  | 0.45476 | 0.00917 | 131.80560 | 27.02   | 0.21328 | 0.09699 |
| China       | Sri Lanka | 0.24353 | 0.01841 | 133.18750 | 13.33   | 0.21586 | 0.05257 |
| China       | Israel    | 0.15329 | 0.01031 | 134.00000 | 24.00   | 0.21683 | 0.03324 |
| China       | Turkey    | 0.41607 | 0.01248 | 135.37500 | 19.78   | 0.21905 | 0.09114 |
| China       | Mexico    | 0.37662 | 0.01852 | 132.69120 | 13.25   | 0.21471 | 0.08087 |
| China       | Brazil    | 0.31652 | 0.02244 | 130.08330 | 10.89   | 0.21152 | 0.06695 |
| China       | Argentina | 0.41432 | 0.03709 | 131.80000 | 6.49    | 0.21327 | 0.08836 |
| Mongolia    | Sri Lanka | 0.15414 | 0.00896 | 41.17901  | 27.64   | 0.06674 | 0.01029 |
| Mongolia    | Israel    | 0.11540 | 0.00277 | 53.74074  | 90.00   | 0.08696 | 0.01004 |
| Mongolia    | Turkey    | 0.62046 | 0.00277 | 34.59259  | 90.00   | 0.05598 | 0.03473 |
| Mongolia    | Mexico    | 0.18472 | 0.00901 | 20.60131  | 27.51   | 0.03334 | 0.00616 |
| Mongolia    | Brazil    | 0.11508 | 0.01334 | 26.94709  | 18.50   | 0.04382 | 0.00504 |
| Mongolia    | Argentina | 0.61011 | 0.02928 | 28.91111  | 8.29    | 0.04678 | 0.02854 |
| Sri Lanka   | Israel    | -       | 0.01390 | 71.61111  | 17.74   | 0.11606 | -       |
|             |           | 0.06724 |         |           |         |         | 0.00780 |
| Sri Lanka   | Turkey    | 0.23073 | 0.00514 | 54.61852  | 48.39   | 0.08852 | 0.02042 |
| Sri Lanka   | Mexico    | 0.02060 | 0.00726 | 46.64379  | 34.16   | 0.07560 | 0.00156 |
| Sri Lanka   | Brazil    | 0.00227 | 0.01085 | 52.44709  | 22.79   | 0.08542 | 0.00019 |
| Sri Lanka   | Argentina | 0.18815 | 0.03989 | 49.46667  | 6.02    | 0.08017 | 0.01508 |
| Israel      | Turkey    | 0.06116 | 0.01060 | 58.28889  | 23.33   | 0.09432 | 0.00577 |
| Israel      | Mexico    | -       | 0.01693 | 58.25490  | 14.52   | 0.09426 | -       |
|             |           | 0.00232 |         |           |         |         | 0.00022 |
| Israel      | Brazil    | -       | 0.02196 | 61.88095  | 11.14   | 0.10062 | -       |
|             |           | 0.04944 |         |           |         |         | 0.00497 |
| Israel      | Argentina | 0.02580 | 0.02604 | 54.26667  | 9.35    | 0.08781 | 0.00227 |
| Turkey      | Mexico    | 0.29436 | 0.00565 | 33.98431  | 44.01   | 0.05499 | 0.01619 |
| Turkey      | Brazil    | 0.25178 | 0.00897 | 41.47301  | 27.61   | 0.06744 | 0.01698 |
| Turkey      | Argentina | 0.05445 | 0.03465 | 19.52000  | 6.96    | 0.03159 | 0.00172 |
| Mexico      | Brazil    | 0.00566 | 0.00013 | 34.73949  | 1858.72 | 0.05649 | 0.00032 |
| Mexico      | Argentina | 0.22197 | 0.03992 | 28.43529  | 6.01    | 0.04601 | 0.01021 |
| Brazil      | Argentina | 0.19579 | 0.04320 | 36.27619  | 5.54    | 0.05899 | 0.01155 |

Fst, Wright's F-statistics for pairwise genetic distance; Gst, genetic differentiation index based on the frequency of haplotypes; Nm, gene flow value; Kxy, average proportion of nucleotide differences between populations; Dxy, average number of nucleotide substitutions per site between populations; Da, number of net nucleotide substitutions per site between populations.

**Supplementary Table S6.** Intra-population genetic diversity of *B. bovis* MSA genes isolates based on their country of origin

| Fragment/Country | n  | S   | Eta | <i>p</i> (%) | K         | $\pi$   | H  | Hd    | C     |
|------------------|----|-----|-----|--------------|-----------|---------|----|-------|-------|
| <b>MSA1</b>      |    |     |     |              |           |         |    |       |       |
| Ghana            | 7  | 288 | 292 | 0.0 – 37.4   | 85.23810  | 0.11186 | 5  | 0.857 | 0.295 |
| Vietnam          | 9  | 382 | 463 | 0.0 – 37.3   | 194.05556 | 0.27882 | 8  | 0.972 | 0.157 |
| Philippines      | 10 | 392 | 548 | 0.0 – 38.7   | 186.86667 | 0.28313 | 7  | 0.933 | 0.135 |
| Sri Lanka        | 8  | 493 | 671 | 0.1 – 55.4   | 219.46429 | 0.32085 | 8  | 1.000 | 0.141 |
| Thailand         | 98 | 509 | 929 | 0.0 – 57.3   | 186.59268 | 0.31099 | 54 | 0.981 | 0.096 |
| China            | 13 | 390 | 432 | 0.0 – 40.4   | 195.89744 | 0.23074 | 11 | 0.962 | 0.211 |
| Mongolia         | 8  | 41  | 41  | 0.0 – 2.2    | 10.96429  | 0.01265 | 7  | 0.964 | 0.393 |
| Mexico           | 13 | 434 | 552 | 0.0 – 37.7   | 161.01282 | 0.20026 | 10 | 0.949 | 0.170 |
| Brazil           | 17 | 469 | 718 | 0.0 – 60.9   | 181.13235 | 0.31284 | 16 | 0.993 | 0.150 |
| Australia        | 13 | 476 | 711 | 0.0 – 58.9   | 233.21795 | 0.38295 | 10 | 0.962 | 0.129 |
| <b>MSA-2b</b>    |    |     |     |              |           |         |    |       |       |
| South Africa     | 11 | 155 | 181 | 0.0 – 29.7   | 67.03636  | 0.16552 | 8  | 0.927 | 0.617 |
| Mozambique       | 9  | 165 | 191 | 0.0 – 29.3   | 76.30556  | 0.18841 | 6  | 0.917 | 0.593 |
| Vietnam          | 37 | 203 | 263 | 0.0 – 30.3   | 71.46246  | 0.17645 | 20 | 0.940 | 0.499 |
| Thailand         | 23 | 180 | 219 | 0.0 – 29.0   | 53.49802  | 0.13209 | 16 | 0.953 | 0.556 |
| Sri Lanka        | 18 | 152 | 168 | 0.0 – 29.7   | 63.39216  | 0.15652 | 12 | 0.922 | 0.625 |
| Philippines      | 14 | 131 | 148 | 0.0 – 28.4   | 53.17582  | 0.13130 | 7  | 0.824 | 0.677 |
| China            | 7  | 154 | 184 | 0.0 – 29.3   | 71.09524  | 0.17554 | 6  | 0.952 | 0.620 |
| Israel           | 7  | 143 | 188 | 0.0 – 31.4   | 68.333    | 0.16872 | 6  | 0.952 | 0.647 |
| Mexico           | 27 | 131 | 141 | 0.0 – 30.9   | 45.32479  | 0.11191 | 19 | 0.957 | 0.675 |
| Puerto Rico      | 18 | 185 | 213 | 0.0 – 34.4   | 69.19608  | 0.17085 | 15 | 0.974 | 0.543 |
| Brazil           | 18 | 184 | 217 | 0.0 – 29.5   | 65.90196  | 0.16517 | 12 | 0.915 | 0.534 |
| <b>MSA-2c</b>    |    |     |     |              |           |         |    |       |       |
| Vietnam          | 35 | 99  | 107 | 0.0 – 9.1    | 29.18319  | 0.04722 | 30 | 0.990 | 0.840 |
| Sri Lanka        | 18 | 262 | 277 | 0.0 – 48.9   | 63.71895  | 0.10327 | 15 | 0.980 | 0.576 |
| Philippines      | 14 | 285 | 336 | 0.0 – 46.8   | 103.03297 | 0.16672 | 13 | 0.989 | 0.539 |

|                |    |     |     |            |          |         |    |       |       |
|----------------|----|-----|-----|------------|----------|---------|----|-------|-------|
| China-Mongolia | 17 | 264 | 296 | 0.0 – 47.6 | 99.72059 | 0.16136 | 16 | 0.993 | 0.573 |
| Turkey         | 15 | 110 | 118 | 0.2 –      | 20.31429 | 0.03287 | 15 | 1.000 | 0.822 |
| Mexico         | 17 | 104 | 111 | 0.0 – 11.1 | 27.64706 | 0.04474 | 15 | 0.978 | 0.832 |
| Brazil         | 21 | 270 | 298 | 0.0 – 46.0 | 41.74762 | 0.06788 | 16 | 0.967 | 0.558 |
| Vietnam        | 35 | 99  | 107 | 0.0 – 9.1  | 29.18319 | 0.04722 | 30 | 0.990 | 0.840 |

n, number of sequences tested; L, base pair length of the aligned sequences; S, number of segregating (polymorphic/variable) sites; Eta, total number of mutations;  $p$ , pairwise distance;  $\pi$ , nucleotide diversity; K, average number of pairwise nucleotide differences; H, number of haplotypes; Hd, haplotype diversity; C, sequence conservation.
